# Supplementary material for: A review of antimicrobial stewardship training in medical education
Source: PubMed Central journal article supplement (PMC5694692; doi:10.5116/ijme.59ba.2d47), 2017-10-12
Supplement: ijme-8-353-S1.pdf [file ijme-8-353-S1.pdf]

## Appendix A

## Studies with antimicrobial stewardship medical education interventions

| Author, year              | Article type and location  | Purpose of intervention                                                                                                                                                                                                                                     | Intervention design                                                                                                                                                                                                                                                                                                     | Target learner group                                                       | Variables of interest                                                                                           | Results and conclusions                                                                                                                                                                                                                                                                                                                                                                              | Kirkpatrick evaluation level <sup>7</sup> |
|---------------------------|----------------------------|-------------------------------------------------------------------------------------------------------------------------------------------------------------------------------------------------------------------------------------------------------------|-------------------------------------------------------------------------------------------------------------------------------------------------------------------------------------------------------------------------------------------------------------------------------------------------------------------------|----------------------------------------------------------------------------|-----------------------------------------------------------------------------------------------------------------|------------------------------------------------------------------------------------------------------------------------------------------------------------------------------------------------------------------------------------------------------------------------------------------------------------------------------------------------------------------------------------------------------|-------------------------------------------|
| Brennan and Mattock, 2013 | Review<br>N/A              | N/A                                                                                                                                                                                                                                                         | Intervention types include: educational materials, conferences and training, audit and feedback, outreach visits, reminders, marketing, patient-mediated interventions, and use of a local opinion leader. Most interventions used more than one strategy.                                                              | Residents and young doctors. Young prescribers in other health professions | A variety of outcome measures have been used, most commonly rates of appropriate/inappropriate prescribing      | Most interventions were effective. No firm conclusions can be drawn about the most effective type of intervention, as some studies found one strategy effective while others found the same one ineffective.                                                                                                                                                                                         | No evaluation                             |
| Davenport et al, 2005     | Research<br>United Kingdom | To understand outcome-based education and how it has been applied and then been implemented in regards to antimicrobial prescribing                                                                                                                         | A resource template for teaching prudent prescribing included: (i) standardized vignettes covering the 12 learning outcome domains; (ii) a reflective patient record book, including a personal antibiotic formulary; (iii) discussion session guidelines; (iv) prescribing exercises; and (v) a support resource pack. | Medical students                                                           | Prescribing patterns                                                                                            | Educational approaches should strive to achieve predetermined outcomes and the intervention should be used in curricula                                                                                                                                                                                                                                                                              | No evaluation                             |
| Davey et al, 2007         | Review<br>United Kingdom   | To press for greater coverage of prudent antimicrobial use in undergraduate and postgraduate curricula; to lead in better integration of antimicrobial teaching in a variety of settings                                                                    | Specialist Advisory Committee on Antimicrobial Resistance evaluating educational approaches                                                                                                                                                                                                                             | N/A                                                                        | Attitudes and belief post ASP intervention through questionnaire, number of requests for restricted antibiotics | Hospitals continue to use different metrics in surveillance but are eager to collaborate. The SACAR Initiative has established a framework for UK collaboration on multi-disciplinary education that will define learning outcomes for all health professionals.                                                                                                                                     | No evaluation                             |
| Davey et al, 1993         | Research<br>United Kingdom | To examine methods of determining and influencing antimicrobial use in the UK - specifically, evaluating undergraduate and postgraduate education on antimicrobial chemotherapy to establish what info is available and amount and content of the education | Questionnaires evaluating undergraduate and postgraduate curricula; undergraduate teaching mostly lecture based, postgraduate included consulting specialists and using material from drug information centres                                                                                                          | Medical students and residents                                             | What are the main factors that influence prescribing behaviour                                                  | The median amount of core undergraduate teaching was 13.5h but with a wide range. Content was oriented towards drugs rather than diseases. Most teaching was by formal lecture as part of a core programme. Postgraduate: advice from specialists and requests from practitioners most important determinants of content. Information from drug info centres discussed drugs not diseases. Knowledge | No evaluation                             |

| Author, year                    | Article type and location           | Purpose of intervention                                                                                                                                                                                  | Intervention design                                                                                                                                                                                                                                       | Target learner group                       | Variables of interest                                                     | Results and conclusions                                                                                                                                                                                                                                                                     | Kirkpatrick evaluation level <sup>7</sup> |
|---------------------------------|-------------------------------------|----------------------------------------------------------------------------------------------------------------------------------------------------------------------------------------------------------|-----------------------------------------------------------------------------------------------------------------------------------------------------------------------------------------------------------------------------------------------------------|--------------------------------------------|---------------------------------------------------------------------------|---------------------------------------------------------------------------------------------------------------------------------------------------------------------------------------------------------------------------------------------------------------------------------------------|-------------------------------------------|
|                                 |                                     |                                                                                                                                                                                                          |                                                                                                                                                                                                                                                           |                                            |                                                                           | should be disseminated through local networks of practitioners; all doctors require education; need national coordination of information dissemination                                                                                                                                      |                                           |
| Ghafur 2013                     | Opinion India                       | To reduce resistance rates and treat bacterial infections; to develop a functioning policy for antibiotics use and infrastructure for infection control                                                  | Curriculum must be revised to be less didactic, focus more on diseases of the tropics, rational antibiotics usage, and infection control.                                                                                                                 | Medical students and postgraduate trainees | N/A                                                                       | Incorporate more infectious disease training in all major teaching hospitals; more clinically oriented basic science training                                                                                                                                                               | No evaluation                             |
| Greenwood, 1998                 | Opinion United Kingdom              | Antimicrobial resistance is a growing problem that must be curtailed; in order for antimicrobial chemotherapy to have a secure future, prescribers must learn to use these tools with greater discretion | Teaching in the UK is spasmodic. Nottingham offers a 2-week module on antimicrobial therapy for third year students. Most schools: a few lectures on principles, and practical prescribing should be learnt at the bedside. Postgraduate: little is done. | Medical students and residents             | Hours and types of hours spent in undergraduate and postgraduate settings | Students are still unprepared and are not knowledgeable in stewardship                                                                                                                                                                                                                      | No evaluation                             |
| Kerr <i>et al.</i> , 2001       | Letter to the editor United Kingdom | To understand the amount of contact time allocated to teaching about the rational use of antimicrobials at UK medical schools and the University of St Andrews                                           | Research study described: postal survey                                                                                                                                                                                                                   | Medical students                           | Number of contact hours; methods of teaching                              | Number of hours dedicated varies greatly (0.5-22h); difficult to quantify exposure during teaching of other topics and in clinical setting; main methods of teaching was generally lectures, but also supplemented with tutorials and learning exercises, as well as self-directed learning | No evaluation                             |
| Le Normand <i>et al.</i> , 1994 | Research France                     | To develop a program to help teach the basic principles of antibiotic monitoring for time-dependent and concentration-dependent bactericidal                                                             | Multidisciplinary tutorial programs. Students given clinical case information, and plan treatment. System evaluates students' choice and provides commentary to evaluate the efficacy of treatment                                                        | Does not state                             | Not stated                                                                | Programs are complimentary to conventional teaching                                                                                                                                                                                                                                         | No evaluation                             |

| Author, year                     | Article type and location             | Purpose of intervention                                                                                              | Intervention design                                                                                                                                                                                                                                                                                                     | Target learner group                           | Variables of interest                                                                                                                                                    | Results and conclusions                                                                                                                                                                                                                                                                                                                                          | Kirkpatrick evaluation level <sup>7</sup> |
|----------------------------------|---------------------------------------|----------------------------------------------------------------------------------------------------------------------|-------------------------------------------------------------------------------------------------------------------------------------------------------------------------------------------------------------------------------------------------------------------------------------------------------------------------|------------------------------------------------|--------------------------------------------------------------------------------------------------------------------------------------------------------------------------|------------------------------------------------------------------------------------------------------------------------------------------------------------------------------------------------------------------------------------------------------------------------------------------------------------------------------------------------------------------|-------------------------------------------|
|                                  |                                       | molecules                                                                                                            |                                                                                                                                                                                                                                                                                                                         |                                                |                                                                                                                                                                          |                                                                                                                                                                                                                                                                                                                                                                  |                                           |
| Lee et al, 2013                  | Review<br>N/A                         | To summarize and discuss various strategies to minimize antibiotic resistance                                        | N/A                                                                                                                                                                                                                                                                                                                     | Medical students post-graduate trainees, staff | Courses in numbers and days, number of inappropriate prescriptions, number of duplicative gram-negative coverage with iv fluoroquinolones, duration of inappropriate use | Decreasing resistance requires involvement of students, staff, and the public. While much education has been targeted at staff and some at children, undergraduate training courses would be successful if the students are imparted with adequate knowledge, and trained in developing the right attitude and behavior. All health professions require teaching | No evaluation                             |
| Lee et al, 2015                  | Review<br>N/A                         | To investigate recent studies on the effect of interventions for promoting prudent antibiotics prescribing,          | N/A                                                                                                                                                                                                                                                                                                                     | Medical students and staff                     | Usage of diagnostic tests, choice of antibiotics, clinical outcomes (length of antibiotic treatment, length of stay, mortality)                                          | There is no randomized control trial study assessing the effectiveness of educational programs for medical students. There is no study measuring the effectiveness of an educational program on prudent antibiotic prescribing for medical students                                                                                                              | No evaluation                             |
| Luther et al, 2013               | Letter to the editor<br>United States | To increase appropriate antibiotic use                                                                               | Antimicrobial stewardship pilot curriculum: didactic presentations and exam questions in USMLE format; clinical years have small-group activities                                                                                                                                                                       | Medical students                               | N/A                                                                                                                                                                      | N/A                                                                                                                                                                                                                                                                                                                                                              | No evaluation                             |
| McNulty, Cookson and Lewis, 2012 | Program description<br>United Kingdom | Examines what is currently being done in terms of antimicrobial stewardship in the UK / in Europe                    | Inclusion of hygiene and aseptic practice in the induction for the foundation years; infection control procedures are key competencies in second year; inclusion of infection control in appraisal for foundation year and specialist registrar trainees; infection control elements within the exams of Royal Colleges | Undergraduate, post-graduate, public, staff    | N/A                                                                                                                                                                      | The CMO is at the point where they are asking if it is indeed being taught / included at an undergrad and postgrad level                                                                                                                                                                                                                                         | No evaluation                             |
| Philp, Wilford and Low, 1986     | Research<br>United Kingdom            | To better define the scope of the failure for residents to prescribe rationally despite their lecture-based training | Research pharmacist examined ward prescription sheets and questioned residents about antimicrobial orders compared to labs if labs ordered                                                                                                                                                                              | Residents                                      | Number of antimicrobial prescriptions written; before or after labs; rational and appropriate prescription of antibiotics                                                | Residents prescribed rationally when they had seen the labs but prescribed inappropriately if they did so before labs came back. Residents do not follow the methodology they were taught in class                                                                                                                                                               | No evaluation                             |

| Author, year              | Article type and location    | Purpose of intervention                                                                                                                             | Intervention design                                                                                                          | Target learner group                              | Variables of interest                                                                                                                                                              | Results and conclusions                                                                                                                                                                                                                                                                                                                                                                                                                                                                                                                                                                                                                                                                                                                                                                                                                                                                 | Kirkpatrick evaluation level <sup>7</sup> |
|---------------------------|------------------------------|-----------------------------------------------------------------------------------------------------------------------------------------------------|------------------------------------------------------------------------------------------------------------------------------|---------------------------------------------------|------------------------------------------------------------------------------------------------------------------------------------------------------------------------------------|-----------------------------------------------------------------------------------------------------------------------------------------------------------------------------------------------------------------------------------------------------------------------------------------------------------------------------------------------------------------------------------------------------------------------------------------------------------------------------------------------------------------------------------------------------------------------------------------------------------------------------------------------------------------------------------------------------------------------------------------------------------------------------------------------------------------------------------------------------------------------------------------|-------------------------------------------|
| Pulcini and Gyssens, 2013 | Review<br>N/A                | To educate medical students on principles of microbiology, infectious diseases and clinical pharmacology, and on prudent prescribing of antibiotics | N/A                                                                                                                          | Medical students, children, junior doctors, staff | When should antimicrobial stewardship education start; who should educate; how should they be educated                                                                             | Education should exist in medical school starting in year 3 of a 4 year program, not just in post-graduate setting                                                                                                                                                                                                                                                                                                                                                                                                                                                                                                                                                                                                                                                                                                                                                                      | No evaluation                             |
| Pulcini et al, 2015       | Research<br>Europe           | To educate European medical students; to determine antibiotic education in medical curricula                                                        | Questionnaire and interviews with lecturers to evaluate medical school curricula                                             | Medical Students                                  | Teaching principles for prudent antibiotic use in undergraduate curriculum; Association among curriculum, antibiotic use and/or rates of bacterial resistance at the country level | Prudent antibiotic use principles were taught in all but one school, but only 4/13 countries had a national programme. Interactive teaching formats were used less frequently than passive formats: clinical case discussions, active learning assignments, web-based server software learning platform, E-learning, role-play were used variably; lectures were used in all cases. Opportunities for implementation in curricula were variable. There was no significant association between the level of teaching of prudent antibiotic use and either prevalence of bacterial resistance, outpatient antibiotic use and total antibiotic use. Lack of time one of the main constraints preventing it from being included more heavily in curricula. There is wide variation even amongst students within the same country in terms of exposure to antibiotic prescribing principles. | No evaluation                             |
| Shankar et al 2011        | Program description<br>Nepal | To improve teaching of antibiotics to medical students                                                                                              | Problem-based learning used to teach pharmacology with 10 developed subject areas that students should learn in pharmacology | Medical students                                  | N/A                                                                                                                                                                                | Rational use of antibiotics has been embedded throughout a small group module. The module with modifications                                                                                                                                                                                                                                                                                                                                                                                                                                                                                                                                                                                                                                                                                                                                                                            | No evaluation                             |

| Author, year                   | Article type and location  | Purpose of intervention                                                                                                                 | Intervention design                                                                                                                                                            | Target learner group                        | Variables of interest                                                                                                                                                       | Results and conclusions                                                                                                                                                                                                                                                                      | Kirkpatrick evaluation level <sup>7</sup>                                 |
|--------------------------------|----------------------------|-----------------------------------------------------------------------------------------------------------------------------------------|--------------------------------------------------------------------------------------------------------------------------------------------------------------------------------|---------------------------------------------|-----------------------------------------------------------------------------------------------------------------------------------------------------------------------------|----------------------------------------------------------------------------------------------------------------------------------------------------------------------------------------------------------------------------------------------------------------------------------------------|---------------------------------------------------------------------------|
|                                |                            |                                                                                                                                         |                                                                                                                                                                                |                                             |                                                                                                                                                                             | can be considered for inclusion in other medical schools                                                                                                                                                                                                                                     |                                                                           |
| Wright and Jain, 2004          | Opinion<br>United Kingdom  | To review undergraduate medical education on AMR                                                                                        | Survey on knowledge of antibiotics and resistance were given to final year medical students before additional teaching. Spread teaching by medical microbiologists (tutorials) | Medical Students                            | Knowledge of antibiotics and of resistant organisms; no analysis given on interventions                                                                                     | Students do not always know the brand names of generic drugs; students had a good understanding of resistant organisms but overestimated antibiotics prescription rates in hospital. No analysis given on intervention                                                                       | Level 2 of medical students, but no evaluation of the additional teaching |
| Bannan <i>et al.</i> , 2009    | Research<br>Australia      | To elicit attitudes of the ASP's aims, utility, educational value, effect on patient care and ease of use                               | Self-administered questionnaire, ASP program required receiving ID approval of restricted antibiotics, attitudinal and belief questions measured.                              | Interns, RMO and staff                      | Knowledge, attitudes and beliefs on the system; use of the system                                                                                                           | 98% of staff found ASP reasonable. Most believed it made teams think carefully about antibiotic choice. It was time-consuming and detracted from clinical duties. Intervention was believed by most to improve patient outcomes.                                                             | Level 1                                                                   |
| Beylefeld and Struwig, 2007    | Research<br>South Africa   | To improve medical microbiology teaching and students enthusiasm for it                                                                 | Quiz-type board game                                                                                                                                                           | Medical students                            | Two questionnaire surveys, a focus group interview, direct observation and the nominal group technique                                                                      | Game format effective in improving student engagement                                                                                                                                                                                                                                        | Level 1                                                                   |
| Cheunchom <i>et al.</i> , 2016 | Research<br>Thailand       | To identify knowledge, perception & attitudes concerning antimicrobial resistance & infection control among final year medical students | Questionnaire-based study among final year Thai medical students                                                                                                               | Final year undergraduate medical students   | Survey assessed student's perception and attitudes towards AMR, and knowledge of AMR/infection control. Further educational activities and hospital structure were examined | Student's knowledge concerning AMR, appropriate usage and infection control was limited. Only half of students recognized the existence of an AMS program or infection control unit in their hospitals, highlighting poor access and gaps in current medical education at these institutions | Level 1                                                                   |
| Gharbi <i>et al.</i> , 2016    | Research<br>United Kingdom | To identify junior doctor's knowledge, attitude, behaviours concerning antimicrobial prescription so                                    | Cross-sectional survey investigating junior doctor's antimicrobial prescribing practices & educational needs                                                                   | 140 Junior doctors, form 5 London hospitals | Survey assessed prescribing behaviour of junior doctors, prescribing education & support in the hospital                                                                    | A significant proportion of junior doctors reported prescribing of antimicrobials in the context of low self-perceived confidence and knowledge and                                                                                                                                          | Level 1                                                                   |

| Author, year                      | Article type and location                             | Purpose of intervention                                                                                                                                     | Intervention design                                                                                                                                                                        | Target learner group                                            | Variables of interest                                                                                                                                                        | Results and conclusions                                                                                                                                                                                                                                                                                                                    | Kirkpatrick evaluation level <sup>7</sup> |
|-----------------------------------|-------------------------------------------------------|-------------------------------------------------------------------------------------------------------------------------------------------------------------|--------------------------------------------------------------------------------------------------------------------------------------------------------------------------------------------|-----------------------------------------------------------------|------------------------------------------------------------------------------------------------------------------------------------------------------------------------------|--------------------------------------------------------------------------------------------------------------------------------------------------------------------------------------------------------------------------------------------------------------------------------------------------------------------------------------------|-------------------------------------------|
|                                   |                                                       | as to identify key areas to address future educational programs                                                                                             |                                                                                                                                                                                            |                                                                 | through a needs-based assessment. Multiple logistic regression examined factors associated with confidence prescribing Abx as a junior doctor                                | had difficulty in accessing aid. 5 specific areas needed to bolster junior doctors practicing in secondary care. Specific areas of educational need included: principles of antimicrobial prescribing, diagnosis of infections, clinical review of patients c infections, prescribing in context of AMR & laboratory testing/ test results |                                           |
| Haque et al. 2016                 | Research University of Sultan Zainal Abidin, Malaysia | Assess medical students' knowledge regarding antimicrobial resistance and prescribing and to identify any gaps in education                                 | Cross-sectional, questionnaire-based survey                                                                                                                                                | Medical Students (year 3, 4 & 5)                                | Questionnaire consisted of 21 questions to assess: confidence in prescription, AMR knowledge, amount of training in undergrad studies and self-reported antibiotics usage    | There is an educational gap between theoretical input and clinical practice in terms of AMR and antibiotics prescription. The majority of students (88%) stated desiring more training in their current curriculum concerning antibiotic selection and theory.                                                                             | Level 1                                   |
| Hoque, Mostafa, Haque et al. 2016 | Research Chittagong, Bangladesh                       | To gain insight of medical students concerning antimicrobial prescribing and resistance, assessing readiness from education at private school in Bangladesh | Cross sectional, randomized, questionnaire based study                                                                                                                                     | Medical students (years 3, 4 & 5 (clinical year in Bangladesh)) | Survey assessed student's confidence in AMR & prescription practices, knowledge, amount of training received in curricula and self-reported practices of antimicrobial usage | Students had a lack of confidence in the context of AMR/prescription practices due to a knowledge gap in the proper selection of antimicrobials.                                                                                                                                                                                           | Level 1                                   |
| Minen et al, 2010                 | Research United States                                | To understand medical students' perceptions of their medical education; to identify gaps in medical education                                               | Online survey on perceptions and attitudes of their training in antibiotics. Curriculum had pharmacology and an infectious disease courses that included antimicrobial treatment selection | Medical students                                                | Student opinions and preferences on importance of antibiotics and resistance, feedback and teaching; where students access knowledge;                                        | Student recognition of importance of topic and want more instruction. Medical school curricula should be expanded to provide additional training timed with their clinical rotations. Students have no clear                                                                                                                               | Level 1                                   |

| Author, year                   | Article type and location                    | Purpose of intervention                                                                                                    | Intervention design                                                                                                                                                                   | Target learner group                                | Variables of interest                                                                                                                                                                                                                         | Results and conclusions                                                                                                                                                                                                                                                                                                                                                                                                                                 | Kirkpatrick evaluation level <sup>7</sup> |
|--------------------------------|----------------------------------------------|----------------------------------------------------------------------------------------------------------------------------|---------------------------------------------------------------------------------------------------------------------------------------------------------------------------------------|-----------------------------------------------------|-----------------------------------------------------------------------------------------------------------------------------------------------------------------------------------------------------------------------------------------------|---------------------------------------------------------------------------------------------------------------------------------------------------------------------------------------------------------------------------------------------------------------------------------------------------------------------------------------------------------------------------------------------------------------------------------------------------------|-------------------------------------------|
|                                |                                              |                                                                                                                            |                                                                                                                                                                                       |                                                     | basic knowledge of organisms and resistance                                                                                                                                                                                                   | preference for digital reference use for self-directed continuing education.                                                                                                                                                                                                                                                                                                                                                                            |                                           |
| Nifakos, Tomson and Zary, 2014 | Research Sweden                              | To investigate educational approaches using the real physical context to enrich the educational on antibiotics prescribing | Augmented reality using a drug box                                                                                                                                                    | Residents                                           | Design-Based Research Methodology: problem analysis, investigation of information that should be visualized for the training session, and finally the involvement of the end users the development and evaluation processes of the prototype. | Must further examine how augmented reality could contribute to the improvement of competencies among healthcare professionals and decrease of antibiotics resistance. The prototype needs further development; it had a high level of acceptance amongst students                                                                                                                                                                                       | Level 1                                   |
| Priyasheelta et al. 2016       | Research, letter to the editor United States | Evaluate medical trainees' knowledge & education regarding antibiograms                                                    | 20-item survey                                                                                                                                                                        | Postgraduate medical students (residents & interns) | Survey assessed resident/ intern's education surrounding antibiograms: comprised of knowledge-based questions (including antibiograms/ breaking point) & sources of education related to antibiograms                                         | Study found that medical trainees receive limited education surrounding AMR/AM prescription – specifically, this study highlights that education- surrounding antibiograms is deficient & requires further coverage in curricula. Almost all residents/interns were familiar with the definition of an antibiogram, but only 62.2% correctly identified the definition of a 'breakpoint,' and 77.9% knew how to obtain their institution's antibiogram. | Level 1                                   |
| Marwick and Nathwani, 2007     | Letter to the editor United Kingdom          | To improve appropriate antibiotic prescription                                                                             | Promotion of local good practice guidelines, audits of knowledge and behaviour. An outcome based web-based program for teaching and reflecting on learning of antibiotics prescribing | Medical students                                    | Student and staff feedback; student knowledge evaluated through exams                                                                                                                                                                         | More clinically focused teaching through such web-based approaches can effectively improve students knowledge                                                                                                                                                                                                                                                                                                                                           | Levels 1 and Level 2                      |
| Valente et al, 2009            | Research Brazil                              | To integrate basic Bacteriology with mechanisms of action of antimicrobial                                                 | Board game to teach students about antibiotics and resistance                                                                                                                         | Medical students and pharmacy students (under-      | Knowledge pre- and post-intervention; survey on whether students liked                                                                                                                                                                        | There was an increase in the number of right answers and a decrease in the number of unknown                                                                                                                                                                                                                                                                                                                                                            | Level 1 and 2                             |

| Author, year                     | Article type and location           | Purpose of intervention                                                                                                          | Intervention design                                                                                                                                                                                                                                                                | Target learner group                                | Variables of interest                                                                                                                                     | Results and conclusions                                                                                                                                                                                                                                                                                                                                | Kirkpatrick evaluation level <sup>7</sup> |
|----------------------------------|-------------------------------------|----------------------------------------------------------------------------------------------------------------------------------|------------------------------------------------------------------------------------------------------------------------------------------------------------------------------------------------------------------------------------------------------------------------------------|-----------------------------------------------------|-----------------------------------------------------------------------------------------------------------------------------------------------------------|--------------------------------------------------------------------------------------------------------------------------------------------------------------------------------------------------------------------------------------------------------------------------------------------------------------------------------------------------------|-------------------------------------------|
|                                  |                                     | agents                                                                                                                           |                                                                                                                                                                                                                                                                                    | graduate)                                           | the game, and whether they found it an effective learning tool, etc.                                                                                      | answers. There were no significant differences between the courses.                                                                                                                                                                                                                                                                                    |                                           |
| Welch et al, 2000                | Research United Kingdom             | To promote rational antibiotic and analgesic prescribing for non-inpatients attending an emergency department                    | Survey, intervention (prescription pad including a summary of clinical condition) reviewed by panel of experts and rated for appropriateness, followed by educational period, which included lectures, discussion groups, and guideline promotion. Survey and review were repeated | Junior medical officers                             | 'Non-inpatient' prescriptions were collected before education and afterwards.                                                                             | Not statistically significant improvement in antibiotic prescribing trends; use of guidelines did markedly increase. A method has been developed to educate JMOs on therapeutics in the ED that led to a trend in improvement in prescribing of antibiotics but little change in analgesic prescribing. The program was very well accepted by the JMOs | Levels 1 and 3                            |
| Temte et al, 1999                | Research United States              | To improve viral surveillance and improve family medicine residents prescribing of antibiotics                                   | Viral surveillance program as well as detailed educational seminar on respiratory viruses. Chart review to evaluate antibiotics prescription rates and upper respiratory infections                                                                                                | Residents                                           | Familiarity with system and evaluation of training in terms of knowledge provided and its usefulness; rates of antibiotic prescribing in senior residents | By PGY-3 year, 79% felt their education and training had provided adequate knowledge. Most knew about the surveillance program but only 42% pay attention to surveillance reports. 86% had obtained specimens for viral culture. Educational intervention, while did not set out to change physician behaviour, did have this effect.                  | Levels 1 and 3                            |
| Bain 1984                        | Program description United Kingdom  | To assess the diagnosis/treatments for acute earache in children developed by a trainee before and after 6 months with a trainer | 24 Trainers and their Trainees were asked to examine the case histories of 5 children with 24 hours of ear ache                                                                                                                                                                    | Trainers and trainees (does not state level)        | Prescription rates of different medications                                                                                                               | Fall in trainees prescribing of antibiotics for otitis media (although not statistically significant), but this was correlated with an increase in prescribing of decongestant-antihistamines                                                                                                                                                          | Level 2                                   |
| Dawson, Bennett and Ongley, 2010 | Letter to the editor United Kingdom | To evaluate the use of e-learning modules on antibiotic prescribing                                                              | A mandatory induction module; a module on antibiotic prescribing                                                                                                                                                                                                                   | All staff, including residents and medical students | Use of e-learner package and effect on on-site training                                                                                                   | The modules have enabled the junior doctors to become familiar with Trust procedures and IPC and antibiotic policies, and have reduced the time required for on-site                                                                                                                                                                                   | Level 2                                   |



| Author, year                           | Article type and location | Purpose of intervention                                                                                                                                                              | Intervention design                                                                                                                                                                                                                                                                                                        | Target learner group | Variables of interest                                                                                                         | Results and conclusions                                                                                                                                                                                                                                                                                                                                                                                                                                                                                                                                                                                             | Kirkpatrick evaluation level <sup>7</sup> |
|----------------------------------------|---------------------------|--------------------------------------------------------------------------------------------------------------------------------------------------------------------------------------|----------------------------------------------------------------------------------------------------------------------------------------------------------------------------------------------------------------------------------------------------------------------------------------------------------------------------|----------------------|-------------------------------------------------------------------------------------------------------------------------------|---------------------------------------------------------------------------------------------------------------------------------------------------------------------------------------------------------------------------------------------------------------------------------------------------------------------------------------------------------------------------------------------------------------------------------------------------------------------------------------------------------------------------------------------------------------------------------------------------------------------|-------------------------------------------|
|                                        |                           |                                                                                                                                                                                      |                                                                                                                                                                                                                                                                                                                            |                      |                                                                                                                               | induction training                                                                                                                                                                                                                                                                                                                                                                                                                                                                                                                                                                                                  |                                           |
| Faryna, Wergowske and Goldenberg, 1987 | Research United States    | To understand the impact of therapeutic guidelines on outpatient prescribing patterns of internal medicine residents                                                                 | A one-page set of treatment guidelines was designed by internal medicine staff and placed on the desks of their examining rooms. A pre and post intervention survey was collected                                                                                                                                          | Residents            | Antibiotic choice and appropriateness                                                                                         | Pre-intervention showed 50% of antibiotic choices were inappropriate, but there was no significant difference in pre- and post-intervention antibiotic choices. The more experienced a resident, the less appropriate the antibiotics prescription pre-intervention, but there was no difference after between experience levels. The guidelines did not result in a significant decrease in proportion of inappropriate antibiotic prescriptions. More effective surveillance is needed in the area of outpatient antibiotic prescribing by residents; audits are a practical way to monitor prescribing behaviour | Level 2                                   |
| Feucht et al, 2003                     | Research United States    | To improve IV vancomycin and fluoroquinolone prescribing practices with guidelines. (ie: encourage early discontinuation of inappropriate use or duplicative gram negative coverage) | Monthly or semi-monthly conferences on antimicrobial therapy and resistance, as well as guidelines and current hospital practices. Antibiotic use monitoring by clinical pharmacist with consultation if use deemed inappropriate. Reprints of the guidelines were also placed in the medicine physician conference rooms. | Residents and staff  | Number of metrics including number of inappropriate prescriptions, length of course, and number of antibiotic courses overall | The intervention decreases unnecessary duplicative regimens, number of courses overall of some antibiotics, courses over 5 days, and inappropriate prescribing. Appropriate educational intervention programs can alter prescribing patterns in residents, particularly in early discontinuation of inappropriate therapy and altering prescribing practices of fluoroquinolones.                                                                                                                                                                                                                                   | Level 2                                   |
| Huang et al, 2013                      | Research China            | Purpose of survey: to get an overview of the students' understanding of antibiotics, and to compare the medical                                                                      | Curriculum gives intro of infectious diseases. Antibiotic prescription is supervised by clinicians during clinical internship. Gave questionnaire on: knowledge of antibiotics, attitude towards antibiotic                                                                                                                | Medical students     | Knowledge of antibiotic use; attitude and public education on usage of antibiotics; behaviour of                              | Medical school did improve knowledge of antibiotic use; majority of students thought antimicrobial resistance was a problem in China and results from                                                                                                                                                                                                                                                                                                                                                                                                                                                               | Level 2                                   |

| Author, year       | Article type and location | Purpose of intervention                                                                                               | Intervention design                                                                                                                                                                                     | Target learner group                                                               | Variables of interest                                                                                                                                                                                                                                        | Results and conclusions                                                                                                                                                                                                                                                                                                                                                                                                                | Kirkpatrick evaluation level <sup>7</sup> |
|--------------------|---------------------------|-----------------------------------------------------------------------------------------------------------------------|---------------------------------------------------------------------------------------------------------------------------------------------------------------------------------------------------------|------------------------------------------------------------------------------------|--------------------------------------------------------------------------------------------------------------------------------------------------------------------------------------------------------------------------------------------------------------|----------------------------------------------------------------------------------------------------------------------------------------------------------------------------------------------------------------------------------------------------------------------------------------------------------------------------------------------------------------------------------------------------------------------------------------|-------------------------------------------|
|                    |                           | students' and non-medical students' knowledge, attitude and behaviour towards antibiotic use                          | use, perception of public education and practice towards antibiotic use.                                                                                                                                |                                                                                    | using antibiotics                                                                                                                                                                                                                                            | antibiotic abuse and more public education is necessary. Medical students scored worse than non-medical students on behaviour towards use of antibiotics. Medical students got better as they progressed through their years indicating that the schooling improved their knowledge                                                                                                                                                    |                                           |
| Ikai et al, 2012   | Research Japan            | To understand the effect of postgraduate education on physicians' adherence to the guidelines or on patient outcomes. | Systematic lectures and case-based discussions. A hospital-wide restricted formulary to decrease carbapenem. Analysed via chart review.                                                                 | Residents                                                                          | Appropriateness of antibiotics prescribed, reasons for inappropriate use                                                                                                                                                                                     | More frequent blood, sputum cultures and gram stains; less frequent use of broad spectrum antibiotics as initial empiric therapy; median length of stay was shorter after intervention; de-escalation from parental to oral was not significant; more cases were treated with oral abs.                                                                                                                                                | Level 2                                   |
| Pisano et al. 2016 | Research United States    | Study aims to augment reach & boost antimicrobial stewardship through utilization of social media                     | Pre- and post- intervention surveys – including 20 questions on antibiotics & infectious diseases and awareness of ASP initiatives, social media usage & attitudes surrounding antimicrobial resistance | 55 internal medicine residents                                                     | Pre- and post-intervention surveys after the ASP social media intervention (which included trivia questions on antimicrobial resistance/ antibiotics prescription, links to teaching articles or internal content on ASP website – using Twitter & Facebook) | Study concluded that social media proved to be a valuable tool to reinforce ASP initiatives and education, while encouraging the use of ASP so as to promote Antimicrobial mindfulness in clinical practice. knowledge scores increased following the social media education intervention, and access to ASP increased from 70% - 94%. Further, more IMRs indicated using the ASP clinical pathways more frequently post- intervention | Level 2                                   |
| Rawson et al. 2016 | Research United Kingdom   | To investigate the coverage of AMS across UK clinical postgrad curricula & assess quality of education                | Cross-sectional analysis & quality assessment                                                                                                                                                           | Postgraduate medical students (37 specialties; inter-specialty analysis performed) | 37 Specialties assessed: topics & individual learning points relating to antimicrobial stewardship & resistance were                                                                                                                                         | Overall coverage of antimicrobial stewardship & resistance is relatively poor across the majority of UK post-graduate clinical training                                                                                                                                                                                                                                                                                                | Level 2                                   |

| Author, year                 | Article type and location | Purpose of intervention                                                                                                                                                               | Intervention design                                                                                                                                                                                          | Target learner group                           | Variables of interest                                                                                                                                                                                         | Results and conclusions                                                                                                                                                                                                                                                                                                                                                                                                                                                                                                                              | Kirkpatrick evaluation level <sup>7</sup> |
|------------------------------|---------------------------|---------------------------------------------------------------------------------------------------------------------------------------------------------------------------------------|--------------------------------------------------------------------------------------------------------------------------------------------------------------------------------------------------------------|------------------------------------------------|---------------------------------------------------------------------------------------------------------------------------------------------------------------------------------------------------------------|------------------------------------------------------------------------------------------------------------------------------------------------------------------------------------------------------------------------------------------------------------------------------------------------------------------------------------------------------------------------------------------------------------------------------------------------------------------------------------------------------------------------------------------------------|-------------------------------------------|
|                              |                           |                                                                                                                                                                                       |                                                                                                                                                                                                              |                                                | extracted for each specialty, and these were then quality assessed, followed by inter-specialty analysis                                                                                                      | curricula, with little depth of learning enacted. Of the 37 specialties assessed, 2,318 topics & 42,527 learning points were identified – of these, 0.3% topics & 0.4% learning points were related to antimicrobial stewardship/resistance. In contrast, primary care, which is responsible for the highest proportion of antimicrobial usage, only had 0.15% antimicrobial stewardship/resistance learning points. On quality assessment, 60% of learning points required knowledge only, with no demonstration of behaviour in clinical practice. |                                           |
| Zamin, Pitre and Conly, 1997 | Research Canada           | To assess the effect of introducing a route conversion program on the prescribing of antimicrobials for the treatment of respiratory tract infections and skin/soft tissue infections | General medicine wards at a tertiary care health centre had a route conversion program had the insight of infectious disease physicians and microbiologists, as well as pharmacists                          | Medical students post-graduate trainees, staff | Clinical and laboratory parameters related to the status of the infection compared with course of therapy; patient's ability to meet the criteria established in the guidelines; number of days of IV therapy | Even after program introduction, the number of days that IV therapy was continued, despite the appropriateness of oral therapy, was reduced. The program had a positive influence on antimicrobial prescribing behaviour in the population studied.                                                                                                                                                                                                                                                                                                  | Level 2                                   |
| De Souza V et al, 2006       | Research Ireland          | Medical school curriculum: to teach students proper antimicrobial prescribing. Overall: to evaluate factors that influence prescribing by non-consultant hospital doctors             | Curriculum design / influences on young doctors that is discussed: the practices of senior colleagues on their teams; personal experience later in their career; undergraduate lectures; hospital guidelines | Medical students and postgraduate trainees     | Processing and mastery of medical microbiology learning content, enjoyment derived from intervention, Qualitative evidence of positive affect generated by intervention                                       | While undergraduate training in medical microbiology provided information on infections, it left interns insufficiently trained to make autonomous antimicrobial prescribing decisions. Formal undergraduate education on antimicrobial agents, rationale for antimicrobial use, existing hospital guidelines and concerns about                                                                                                                                                                                                                     | Level 3                                   |

| Author, year           | Article type and location                      | Purpose of intervention                                                                                                                    | Intervention design                                                                                                                                                                          | Target learner group                                                                                        | Variables of interest                                                                                                                                      | Results and conclusions                                                                                                                                                                                                                                                                                                                                             | Kirkpatrick evaluation level <sup>7</sup> |
|------------------------|------------------------------------------------|--------------------------------------------------------------------------------------------------------------------------------------------|----------------------------------------------------------------------------------------------------------------------------------------------------------------------------------------------|-------------------------------------------------------------------------------------------------------------|------------------------------------------------------------------------------------------------------------------------------------------------------------|---------------------------------------------------------------------------------------------------------------------------------------------------------------------------------------------------------------------------------------------------------------------------------------------------------------------------------------------------------------------|-------------------------------------------|
|                        |                                                |                                                                                                                                            |                                                                                                                                                                                              |                                                                                                             |                                                                                                                                                            | emerging resistance appear to be minor influences. Those trained in low income countries had greater knowledge and autonomy in their prescribing                                                                                                                                                                                                                    |                                           |
| Irfan et al. 2015      | Research Canada                                | Identify risk factors for unnecessary prescription and to assess impact of educational intervention focused on prescription of antibiotics | Quasi-experimental study, with a control group                                                                                                                                               | Medical residents                                                                                           | Study compared baseline period of patients with positive urine cultures to educational intervention period to compare appropriate antibiotic prescriptions | Educational intervention was effective in the reduction of unnecessary antibiotic use – 52% of control interventions were inappropriately prescribed compared to 8% following intervention                                                                                                                                                                          | Level 3                                   |
| Lee et al, 2014        | Research Canada                                | To optimize antibiotic use through trainee-led time-outs                                                                                   | While receiving monthly education on antimicrobial stewardship, residents adjusted patients' antibiotic therapy through twice-weekly time-out audits using a structured electronic checklist | Residents (medical students were on the team during the audit, but it is unclear whether they participated) | Cost savings, comfort with antibiotic prescribing, patient prescription rates                                                                              | \$70,000 savings associated with 1 hour of faculty time and 8 hours of resident time. 80% of residents adhered to the auditing program and believed it improved their comfort with antibiotics and provided clinical value. 1 in 7 patients had their antibiotics changed after the first audit. Rates of C diff decreased. No mention of medical students directly | Level 3                                   |
| Légaré et al, 2011     | Research Protocol Canada                       | To improve the use of antibiotics in family medicine treatment of acute respiratory infections                                             | Web-based tutorial followed by interactive workshops; addressed clinical decision-making process regarding antibiotics treatment                                                             | Residents and staff                                                                                         | Proportion of patients reporting a decision to use antibiotics immediately                                                                                 | N/A                                                                                                                                                                                                                                                                                                                                                                 | Level 3                                   |
| Main and Koerner, 2012 | Letter to the editor United Kingdom and Europe | To reduce levels of antimicrobial resistance                                                                                               | Audit; using a restricted group of antibiotics                                                                                                                                               | Residents                                                                                                   | Incidence of multi-drug-resistant microbes                                                                                                                 | Reduced incidence of multi-drug-resistant microbes; not enough evidence to expand                                                                                                                                                                                                                                                                                   | Level 3                                   |
| McLellan et al. 2016   | Research United Kingdom                        | Investigate whether & how structured feedback sessions can increase rates of appropriate                                                   | Participants randomized to intervention (pharmacist-led feedback sessions) and control (routine practice) 2 days/week for 6 months, mean normalized prescribing rates &                      | Junior doctors (post graduate residents) in their first year of                                             | Researchers assessed normalized rates of prescription. Further, thematic                                                                                   | Study found that the Pharmacist-led feedback intervention augmented appropriate prescription patterns in junior doctors, by                                                                                                                                                                                                                                         | Level 3                                   |

| Author, year                         | Article type and location | Purpose of intervention                                                                                                                                  | Intervention design                                                                                                                                                                                                                                                        | Target learner group                              | Variables of interest                                                                                                                                                                                                                   | Results and conclusions                                                                                                                                                                                                                                                                                                            | Kirkpatrick evaluation level <sup>7</sup> |
|--------------------------------------|---------------------------|----------------------------------------------------------------------------------------------------------------------------------------------------------|----------------------------------------------------------------------------------------------------------------------------------------------------------------------------------------------------------------------------------------------------------------------------|---------------------------------------------------|-----------------------------------------------------------------------------------------------------------------------------------------------------------------------------------------------------------------------------------------|------------------------------------------------------------------------------------------------------------------------------------------------------------------------------------------------------------------------------------------------------------------------------------------------------------------------------------|-------------------------------------------|
|                                      |                           | antimicrobial prescribing by junior MDs                                                                                                                  | qualitative interviews                                                                                                                                                                                                                                                     | training                                          | analysis of qualitative interviews was completed to gain insight into the feedback workshops                                                                                                                                            | acting as a positive stimulus within a complex network of behavioural influences. The authors conclude that prescribing behaviour is adaptable and can influence best practice guidelines by reducing suboptimal antimicrobial prescribing                                                                                         |                                           |
| Zwar, Gordon and Sanson-Fisher, 1995 | Research Australia        | To improve rational prescribing of antibiotics and benzodiazepines                                                                                       | Randomized control trial evaluating a seminar on rational prescribing focusing on skills and knowledge. Included: information including reference to guidelines, process skills and feedback on performance. Group discussion then held and feedback on performance given. | Residents                                         | Rate of antibiotic prescription for all conditions; prescribing of antibiotics for URTI, choice of antibiotics for conditions including tonsillitis, sinusitis, acute otitis media, etc. Benzodiazepine prescription for all conditions | Group educational approaches to influence prescribing can be effective. Decrease in antibiotic prescribing, but often non-significant decreases in intervention group and increases in control. Further research is needed to assess whether prescribing behaviour is affected by feedback, guidelines, reminders, etc.            | Level 3                                   |
| Zwar et al, 1999                     | Research Australia        | To examine effectiveness of an intervention to reduce antibiotic prescribing in GP trainees for undifferentiated upper RTI and improve antibiotic choice | Individual prescriber feedback, followed by further resources and feedback and educational outreach also given.                                                                                                                                                            | Residents                                         | Diagnostic behaviour                                                                                                                                                                                                                    | Antibiotic prescribing by the intervention group declined, while the control group increased. Prescribing in agreement with accepted guidelines increased in the intervention group, but decreased in the control group. Prescriber feedback and management guidelines influenced antibiotic prescribing and choice of antibiotic. | Level 3                                   |
| Thamlikitkul et al, 1998             | Research Thailand         | To reduce inappropriate prescribing in a hospital setting                                                                                                | Information feedback and antibiotic guidelines through information sessions. Data from patients prescribed antibiotics was collected before and after educational intervention                                                                                             | Residents, staff, and final year medical students | Frequency of antibiotic use and their cost pre-and post-intervention                                                                                                                                                                    | 22% reduction in antibiotics use in inpatients; 23% in outpatients. Most antibiotics are prescribed by residents, GPs in outpatient clinics and final year medical students. The educational program was effective.                                                                                                                | Level 3 and 4                             |

<sup>†</sup>Kirkpatrick Levels of Evaluation: (1) reaction (satisfaction or happiness; what participants thought of the educational intervention), (2) learning (change in attitude and/or knowledge or skills gained assessed by test or demonstration), (3) behaviour (transfer of attitude, knowledge and/or skills to workplace or clinical setting), and (4) results (patient care affected or societal impact due to participation in the educational intervention evaluated).<sup>32</sup>
